# Supplementary material for: Suppression of MAPK11 or HIPK3 reduces mutant Huntingtin levels in Huntington's disease models
Source: PubMed Central journal article supplement (PMC5717400; doi:10.1038/cr.2017.113), 2017-10-13
Supplement: cr2017113x4.pdf [file cr2017113x4.pdf]

# Figure S4

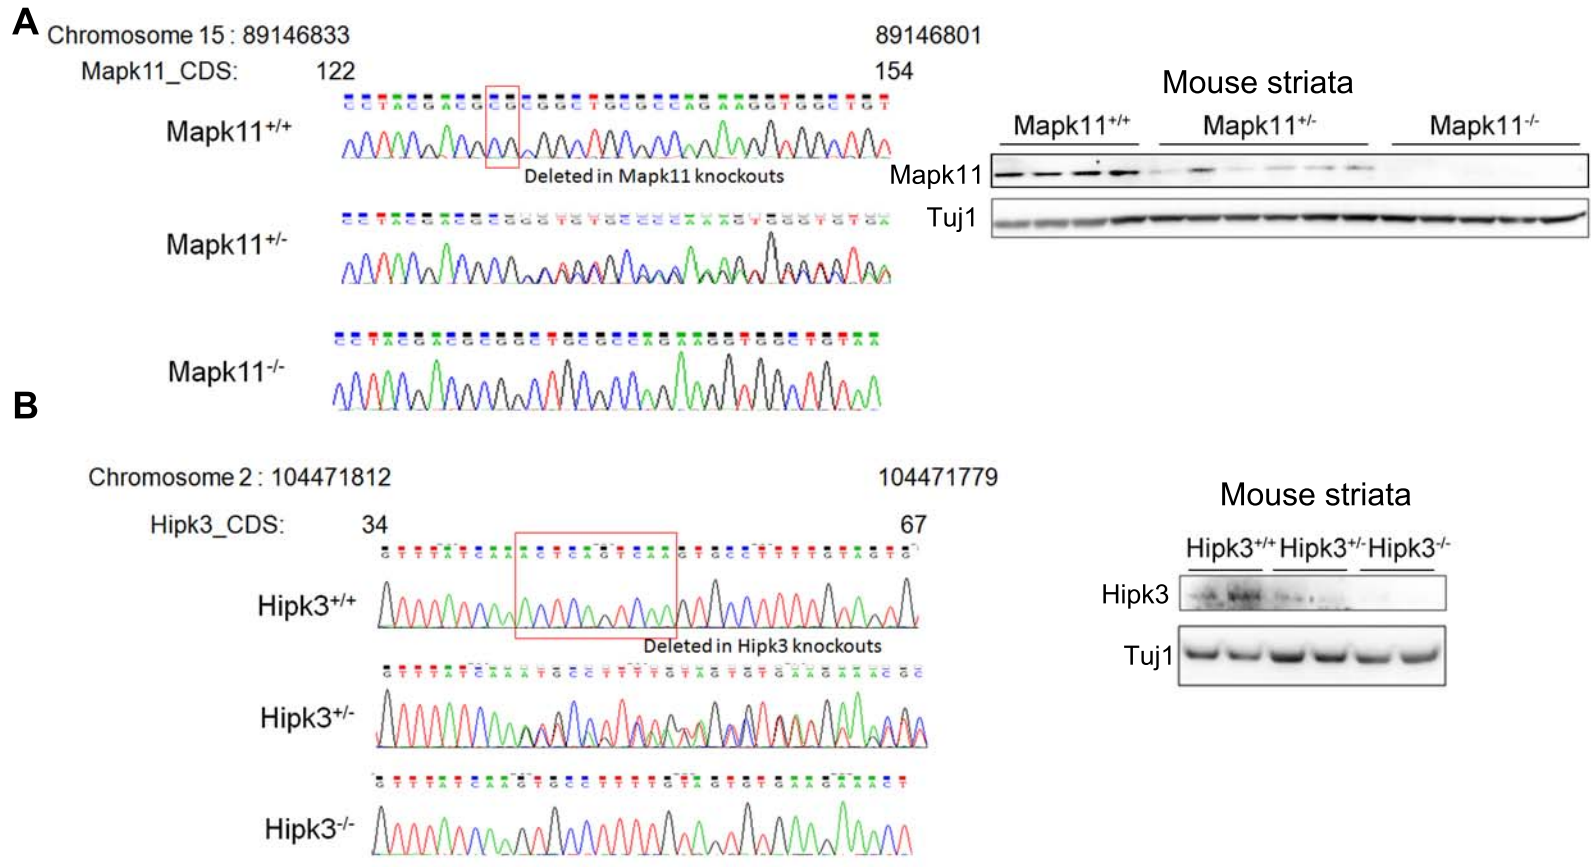

**Figure S4-Supplementary to Figure 2: Mapk11 and Hipk3 knockout mice**

**(A)** *Left:* Representative sequencing results for Mapk11<sup>+/+</sup>, Mapk11<sup>+/-</sup> and Mapk11<sup>-/-</sup> mice. The red box indicates the sequence that is missing in the knockout animal. *Right:* Representative western-blot from mouse striata of the indicated genotypes showing the knockout of Mapk11 protein

**(B)** Similar as (A), but for validation of Hipk3 knockouts. Note that both these genes are in the reverse orientation in the genome. For western-blot, the loading per lane is 20 µg for Mapk11 and 50 µg for Hipk3.
