# Supplementary material for: Suppression of MAPK11 or HIPK3 reduces mutant Huntingtin levels in Huntington's disease models
Source: PubMed Central journal article supplement (PMC5717400; doi:10.1038/cr.2017.113), 2017-10-13
Supplement: cr2017113x5.pdf [file cr2017113x5.pdf]

# Figure S5

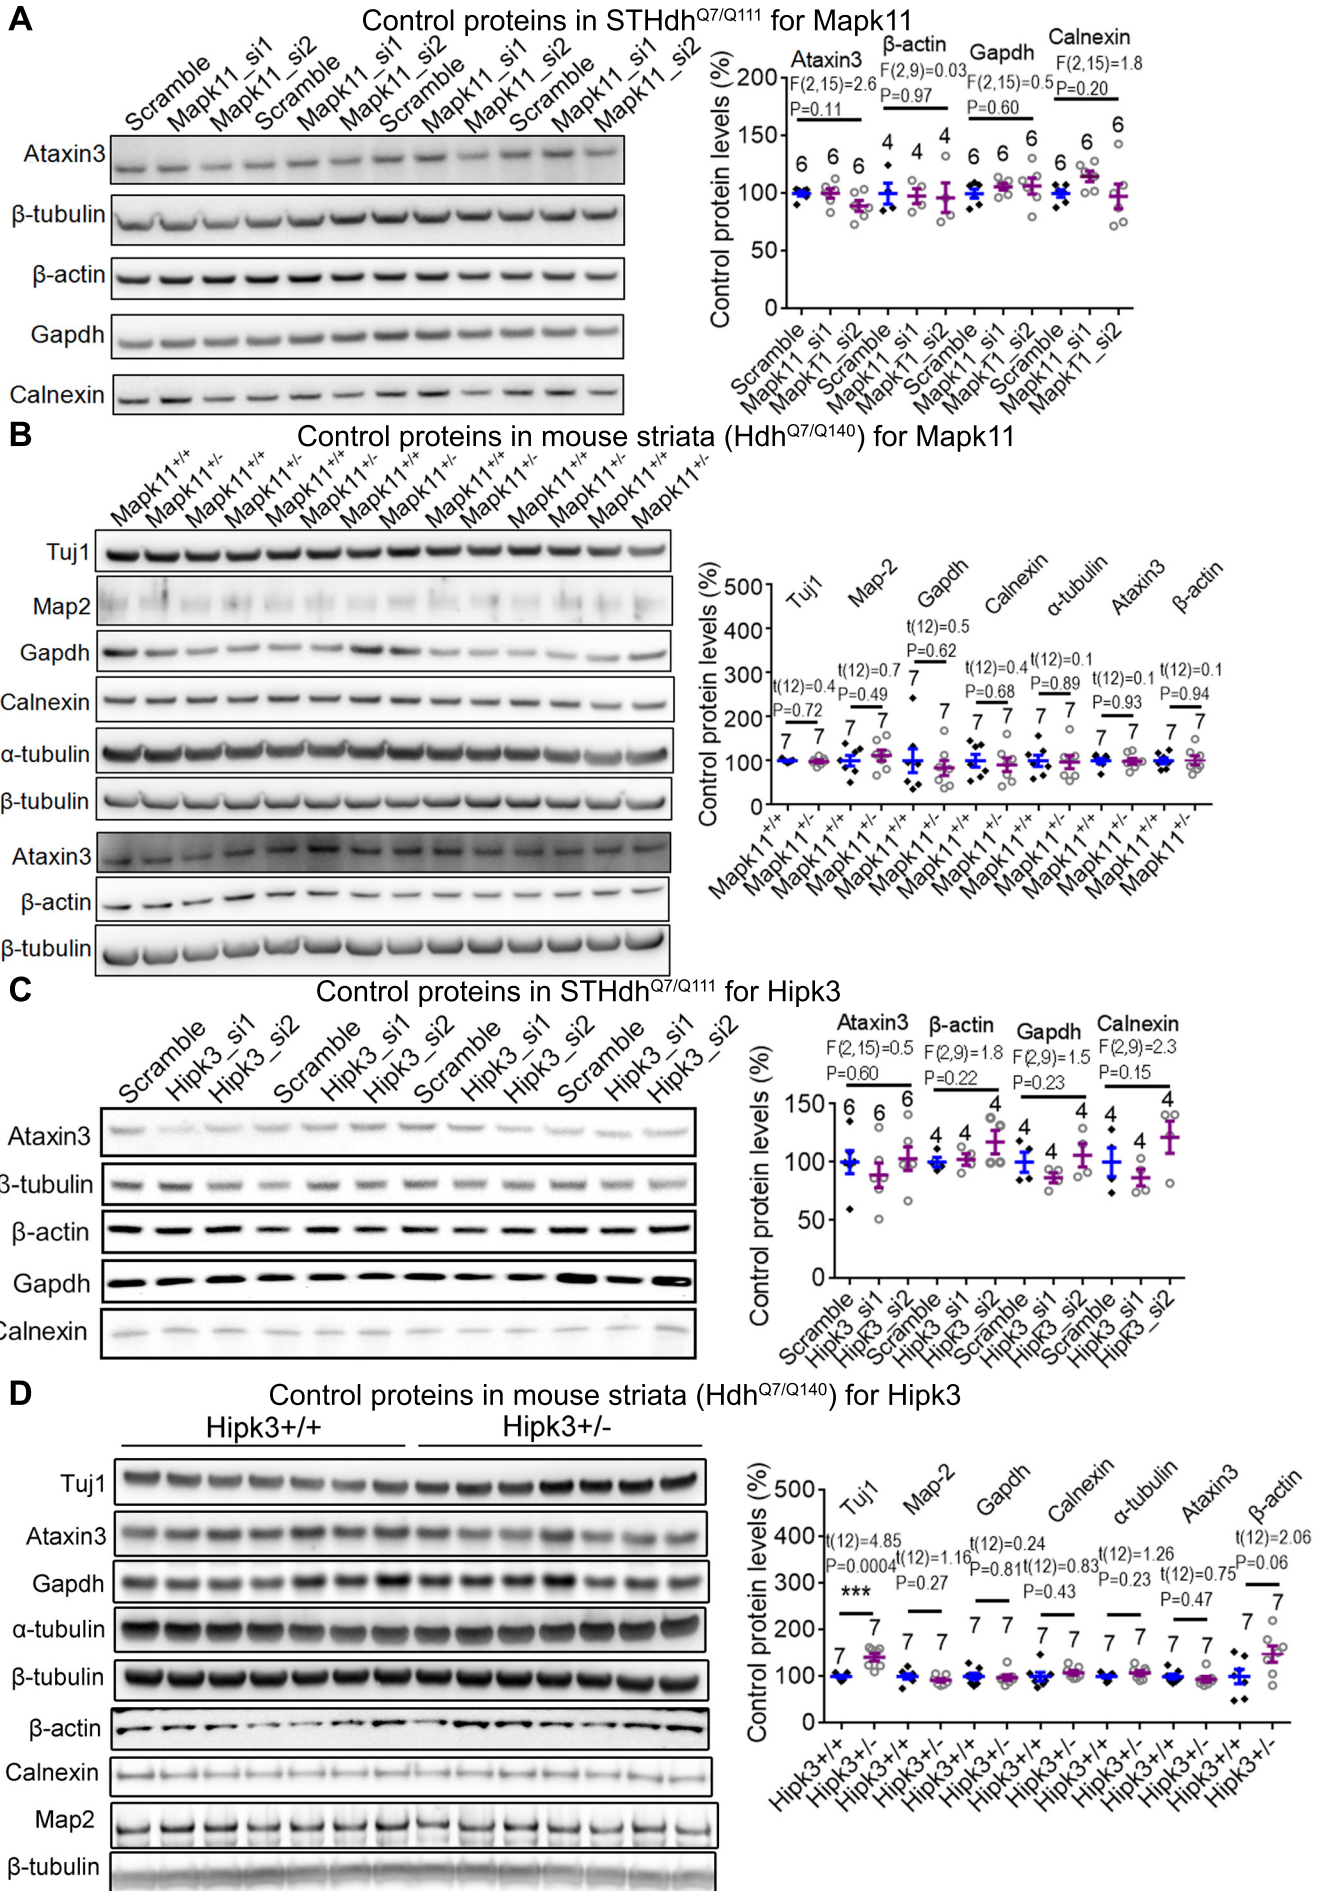

**Figure S5: Lowering Mapk11 or Hipk3 does not reduce control protein levels.**

(A) Western-blot and quantification (normalized to the  $\beta$ -tubulin signals) of control proteins in STHdh<sup>Q7/Q111</sup> cells transfected with the indicated siRNAs (Mapk11 siRNAs versus the control). The statistical analysis was performed by one-way ANOVA. No significance ( $P < 0.05$ ) was detected, and thus no post hoc analysis could be performed. The n, F and p values are indicated on top of the plots. Colored lines indicate mean and SEM.

(B) Western-blot and quantification (normalized to the  $\beta$ -tubulin signals) of control proteins in HD mouse (Hdh<sup>Q7/Q140</sup>) striata with the indicated Mapk11 genotypes. The statistical analysis was performed by two-tailed unpaired t tests. The mice were the same as Figure 2D (6.5m). The n, t and p values are indicated on top of the plots. Colored lines indicate mean and SEM.

(C) Similar as (A), but transfected with Hipk3 siRNAs versus the control.

(D) Similar as (B), with the indicated Hipk3 genotypes. The mice were the same as Figure 2C.
