# Supplementary material for: Suppression of MAPK11 or HIPK3 reduces mutant Huntingtin levels in Huntington's disease models
Source: PubMed Central journal article supplement (PMC5717400; doi:10.1038/cr.2017.113), 2017-10-13
Supplement: cr2017113x9.pdf [file cr2017113x9.pdf]

**Table S1****A**

Component Score Coefficient Matrix

| Component | $\lambda$ | Weight (%) | Accumulative Weight |
|-----------|-----------|------------|---------------------|
| 1         | 7.314     | 20.317     | 20.317              |
| 2         | 5.717     | 15.882     | 36.199              |
| 3         | 3.481     | 9.67       | 45.869              |
| 4         | 3.276     | 9.099      | 54.968              |
| 5         | 2.761     | 7.67       | 62.639              |
| 6         | 2.194     | 6.096      | 68.734              |
| 7         | 1.818     | 5.049      | 73.783              |
| 8         | 1.408     | 3.911      | 77.695              |
| 9         | 1.349     | 3.748      | 81.443              |
| 10        | 1.09      | 3.027      | 84.47               |
| 11        | 1.029     | 2.859      | 87.328              |
| 12        | 0.842     | 2.339      | 89.668              |
| 13        | 0.661     | 1.836      | 91.504              |
| 14        | 0.526     | 1.462      | 92.966              |
| 15        | 0.461     | 1.281      | 94.247              |
| 16        | 0.322     | 0.894      | 95.141              |
| 17        | 0.311     | 0.863      | 96.005              |
| 18        | 0.265     | 0.737      | 96.741              |
| 19        | 0.256     | 0.71       | 97.451              |
| 20        | 0.228     | 0.633      | 98.084              |
| 21        | 0.177     | 0.492      | 98.576              |
| 22        | 0.155     | 0.431      | 99.007              |
| 23        | 0.091     | 0.253      | 99.26               |
| 24        | 0.069     | 0.191      | 99.451              |
| 25        | 0.054     | 0.15       | 99.601              |
| 26        | 0.047     | 0.132      | 99.733              |
| 27        | 0.036     | 0.1        | 99.833              |
| 28        | 0.027     | 0.075      | 99.908              |
| 29        | 0.015     | 0.04       | 99.948              |
| 30        | 0.009     | 0.026      | 99.975              |
| 31        | 0.005     | 0.013      | 99.987              |
| 32        | 0.003     | 0.009      | 99.997              |
| 33        | 0.001     | 0.003      | 99.999              |
| 34        | 0.000     | 0.001      | 100                 |
| 35        | 1.46E-05  | 4.06E-05   | 100                 |
| 36        | 4.74E-16  | 1.32E-15   | 100                 |

**B****Principle Component 1 Coefficients**

| <b>Coupling parameter names</b> | <b>coefficient</b> |
|---------------------------------|--------------------|
| Couplings_RF-&gt;LH_Mean        | -0.03              |
| Couplings_RF-&gt;LH_CStat_Mean  | -0.056             |
| Couplings_RF-&gt;LH_CStat_R     | 0.094              |
| Couplings_LF-&gt;RH_Mean        | -0.033             |
| Couplings_LF-&gt;RH_CStat_Mean  | -0.096             |
| Couplings_LF-&gt;RH_CStat_R     | 0.064              |
| Couplings_LH-&gt;RF_Mean        | -0.018             |
| Couplings_LH-&gt;RF_CStat_Mean  | 0.044              |
| Couplings_LH-&gt;RF_CStat_R     | 0.028              |
| Couplings_RH-&gt;LF_Mean        | 0.032              |
| Couplings_RH-&gt;LF_CStat_Mean  | -0.003             |
| Couplings_RH-&gt;LF_CStat_R     | 0.075              |
| Couplings_LH-&gt;RH_Mean        | 0.063              |
| Couplings_LH-&gt;RH_CStat_Mean  | 0.07               |
| Couplings_LH-&gt;RH_CStat_R     | 0.058              |
| Couplings_LF-&gt;RF_Mean        | -0.069             |
| Couplings_LF-&gt;RF_CStat_Mean  | -0.062             |
| Couplings_LF-&gt;RF_CStat_R     | 0.056              |
| Couplings_RH-&gt;LH_Mean        | -0.047             |
| Couplings_RH-&gt;LH_CStat_Mean  | -0.047             |
| Couplings_RH-&gt;LH_CStat_R     | 0.07               |
| Couplings_RF-&gt;LH_Mean        | 0.067              |
| Couplings_RF-&gt;LH_CStat_Mean  | 0.069              |
| Couplings_RF-&gt;LH_CStat_R     | 0.055              |
| Couplings_RF-&gt;RH_Mean        | 0.063              |
| Couplings_RF-&gt;RH_CStat_Mean  | 0.099              |
| Couplings_RF-&gt;RH_CStat_R     | 0.063              |
| Couplings_LF-&gt;LH_Mean        | -0.064             |
| Couplings_LF-&gt;LH_CStat_Mean  | -0.065             |
| Couplings_LF-&gt;LH_CStat_R     | 0.046              |
| Couplings_RH-&gt;RF_Mean        | -0.104             |
| Couplings_RH-&gt;RF_CStat_Mean  | -0.065             |
| Couplings_RH-&gt;RF_CStat_R     | 0.063              |
| Couplings_LH-&gt;LF_Mean        | 0.028              |
| Couplings_LH-&gt;LF_CStat_Mean  | 0.065              |
| Couplings_LH-&gt;LF_CStat_R     | 0.044              |

**Table S1 – supplementary to Figure 8: Calculation of the principle component 1 for gait analysis**  
**(A)** The component score coefficient matrix calculated by SPSS based on the data obtained from all the

mice tested by the CatWalk gait analysis system (Figure 8F). The top component (principle component 1,  $\lambda=7.314$ ) is used for the measurement of the HD-relevant gait phenotypes. The other major principle components (2, 4, 5 and 6) have no significant difference between HD and WT mice, whereas the principle component 3 has much smaller difference between HD and WT mice compared to the principle component 1, and is not rescued by Mapk11 knockouts.

**(B)** Coefficients of the principle component 1(PC1) used for the calculation for Figure 8F. PC1 is calculated as the weighted sum of the raw value of each coupling parameter.
