# Supplementary material for: Suppression of MAPK11 or HIPK3 reduces mutant Huntingtin levels in Huntington's disease models
Source: PubMed Central journal article supplement (PMC5717400; doi:10.1038/cr.2017.113), 2017-10-13
Supplement: cr2017113x10.pdf [file cr2017113x10.pdf]

**Table S2**

| Parameter                                 | Hdh <sup>Q7/Q7</sup>  |                       |                       | Hdh <sup>Q140/Q140</sup> |                       |                       |
|-------------------------------------------|-----------------------|-----------------------|-----------------------|--------------------------|-----------------------|-----------------------|
|                                           | Mapk11 <sup>+/+</sup> | Mapk11 <sup>+/-</sup> | Mapk11 <sup>-/-</sup> | Mapk11 <sup>+/+</sup>    | Mapk11 <sup>+/-</sup> | Mapk11 <sup>-/-</sup> |
| RF_StrideLength_(cm)_Mean                 | 5.94 ± 0.31           | 5.91 ± 0.36           | 4.87 ± 0.21           | 5.24 ± 0.22              | 4.93 ± 0.24           | 5.48 ± 0.2            |
| RH_MaxContactArea_(cm <sup>2</sup> )_Mean | 0.42 ± 0.04           | 0.39 ± 0.04           | 0.47 ± 0.08           | 0.34 ± 0.03              | 0.47 ± 0.02           | 0.35 ± 0.04           |
| RH_PrintArea_(cm <sup>2</sup> )_Mean      | 0.52 ± 0.04           | 0.5 ± 0.05            | 0.56 ± 0.09           | 0.43 ± 0.03              | 0.55 ± 0.03           | 0.43 ± 0.04           |
| RH_StepCycle_(s)_Mean                     | 0.72 ± 0.15           | 0.64 ± 0.17           | 0.76 ± 0.12           | 0.45 ± 0.03              | 0.57 ± 0.06           | 0.47 ± 0.05           |
| RH_InitialDualStance_(s)_Mean             | 0.11 ± 0.02           | 0.06 ± 0.02           | 0.16 ± 0.04           | 0.06 ± 0.01              | 0.13 ± 0.03           | 0.1 ± 0.04            |
| LH_MaxContactMeanIntensity_Mean           | 89.59 ± 1.9           | 79.1 ± 2.13           | 84.08 ± 1.99          | 79.86 ± 1.63             | 81 ± 1.6              | 84.55 ± 0.75          |
| LH_PrintArea_(cm <sup>2</sup> )_Mean      | 0.54 ± 0.04           | 0.59 ± 0.06           | 0.74 ± 0.07           | 0.46 ± 0.04              | 0.63 ± 0.04           | 0.5 ± 0.05            |
| PhaseDispersions_RF->RH_CStat_R           | 0.9 ± 0.04            | 0.96 ± 0.02           | 0.87 ± 0.11           | 0.8 ± 0.06               | 0.87 ± 0.05           | 0.89 ± 0.06           |
| Couplings_RF->LH_CStat_Mean               | 31.92 ± 9.43          | 27.49 ± 18.29         | 54.49 ± 17.59         | 14.29 ± 4.91             | 23.74 ± 10.55         | 22.49 ± 12.16         |
| Couplings_LF->LH_Mean                     | 58.85 ± 4.62          | 51.42 ± 1.5           | 55.48 ± 2.28          | 51.67 ± 1.87             | 52.19 ± 1.45          | 53.63 ± 1.61          |
| Couplings_RH->RF_CStat_Mean               | 49.74 ± 3.84          | 52.35 ± 3.8           | 43.95 ± 2.11          | 41.26 ± 2.61             | 46.35 ± 1.13          | 49.22 ± 3.05          |
| Run_Maximum_Variation_(%)                 | 66.16 ± 6.94          | 70.4 ± 15.79          | 64.43 ± 11.43         | 80.31 ± 5.46             | 71.41 ± 8.49          | 49 ± 8.32             |
| RF_MaxContactAt_(%)_Mean                  | 37.67 ± 1.98          | 47.17 ± 4.95          | 45.46 ± 2.75          | 46.28 ± 1.5              | 47.38 ± 3.33          | 42.73 ± 4.14          |
| RF_MaxIntensityAt_(%)_Mean                | 52.72 ± 3.55          | 49.33 ± 3.53          | 50.52 ± 2.91          | 59.65 ± 2.68             | 54.39 ± 2.26          | 51.9 ± 3.15           |
| RH_MaxIntensityAt_(%)_Mean                | 42.66 ± 3.59          | 46.61 ± 2.24          | 49.11 ± 5.14          | 52.98 ± 2.68             | 47.57 ± 2.53          | 50.59 ± 3.95          |
| LF_MaxIntensityAt_(%)_Mean                | 52.2 ± 3.01           | 58.65 ± 1.44          | 53.08 ± 2.72          | 59.29 ± 2.46             | 51.41 ± 1.51          | 45.98 ± 2.75          |
| LF_SwingSpeed_(cm/s)_Mean                 | 32.03 ± 2.69          | 35.86 ± 3.69          | 33.91 ± 3.96          | 36.62 ± 2.12             | 31.58 ± 3.13          | 35.83 ± 1.57          |
| LH_MaxContactAt_(%)_Mean                  | 27.04 ± 2.09          | 26.34 ± 2.51          | 27.54 ± 2.97          | 33.03 ± 2.5              | 27.23 ± 2.56          | 23.19 ± 1.58          |
| LH_MaxIntensityAt_(%)_Mean                | 41.51 ± 2.79          | 47.9 ± 4.5            | 47.47 ± 5.03          | 49.32 ± 3.12             | 43.63 ± 2.73          | 48.38 ± 2.24          |
| StepSequence_NumberOfPatterns             | 1.91 ± 0.16           | 2.2 ± 0.2             | 2.86 ± 0.26           | 2.5 ± 0.16               | 2.91 ± 0.34           | 2.56 ± 0.22           |
| OtherStatistics_NumberOfSteps             | 13.69 ± 0.56          | 14.6 ± 1.44           | 16.29 ± 0.75          | 15.75 ± 0.66             | 16.09 ± 1.19          | 14.5 ± 0.57           |
| OtherStatistics_Cadence                   | 6.64 ± 0.46           | 7.32 ± 1.01           | 5.36 ± 0.86           | 7.59 ± 0.42              | 6.47 ± 0.55           | 8.28 ± 0.83           |
| PhaseDispersions_LF->RH_Mean              | 7.72 ± 2.07           | 6.33 ± 3.83           | 10.8 ± 2.83           | 17.17 ± 5.32             | 6.57 ± 2.67           | 10.35 ± 5.32          |
| Couplings_LH->RF_CStat_Mean               | 55.41 ± 9.93          | 26.87 ± 18.17         | 55.21 ± 16.77         | 81.2 ± 6.99              | 69.09 ± 11.23         | 64.94 ± 14.11         |
| Couplings_RH->LF_Mean                     | 67.73 ± 7.82          | 92.67 ± 4.49          | 92.63 ± 1.58          | 84.9 ± 4.81              | 94.09 ± 3.01          | 91.72 ± 3.41          |
| Couplings_LH->RH_CStat_Mean               | 48.3 ± 2.7            | 53.61 ± 1.59          | 54.38 ± 2.91          | 55.59 ± 3.75             | 50.94 ± 1.85          | 51.45 ± 1.67          |

**Table S2-Supplementary to Figure 8: gait analysis using single parameters**

Among the 214 parameters measured by for gait experiments, we selected all the 26 parameters that showed at least 10% difference between HD and WT mice with marginal ( $0.05 < P < 0.2$ ) or significant ( $P < 0.05$ , highlighted in yellow) P values by unpaired two-tailed t test. We then tested whether a certain parameter is rescued (green) or exacerbated (orange) by comparing Mapk11<sup>+/-</sup> or Mapk11<sup>-/-</sup> with Mapk11<sup>+/+</sup> in the same Htt background. The judgment was purely based on the direction of the difference between the averages of the compared groups. Data presented as mean  $\pm$  SEM in every block.
