# Supplementary material for: Suppression of MAPK11 or HIPK3 reduces mutant Huntingtin levels in Huntington's disease models
Source: PubMed Central journal article supplement (PMC5717400; doi:10.1038/cr.2017.113), 2017-10-13
Supplement: cr2017113x11.pdf [file cr2017113x11.pdf]

## Data S1

siRNA order information or target sequences:

Scrambled siRNA: non-targeting siRNA (Thermoscientific Dharmacon)

Mapk11\_si1: ON-TARGETplus Mouse Mapk11 SMARTpool (Thermoscientific Dharmacon, L-050928-00-0005)

Mapk11\_si2: Silencer® Select siRNA (Thermofisher Ambion, #s72151, targeting 5'-CGCCAGAGAUCAUGCUGCAAATT-3')

Map2k6\_si: ON-TARGETplus Mouse Map2k6 SMARTpool (Thermoscientific Dharmacon, L-043421-00-0005)

MAPK11\_si\_1: 5'-CGCAUGUAUGCAUGCACAATT-3'

MAPK11\_si\_2: 5'-GAACACGCCCGGACAUAUATT-3'

MAP2K6\_si1: ON-TARGETplus Human MAPK11 SMARTpool (Thermoscientific Dharmacon)

MAP2K6\_si2: FlexiTube siRNA pool (Qiagen, #GS5608)

ATG5\_si: 5'-GCCUGUAUGUACUGCUUUA-3';

SQSTM1\_si: 5'-GAUCUGCGAUGGCUGCAAU-3';

ATG12\_si: 5'-GAACACCAAGUUUCACUGU-3';

ATG16L\_si: 5'-UGUGGAUGAUUAUCGAUUA-3';

DAXX\_si: 5'-GGAGUUGGAUCUCUCAGAA-3';

HTT siRNA (HTT3): 5'-CAGGUUUAUGAACUGACGUUA-3'

Htt siRNA (B01): 5'-CUCAUUGUGAAUCACAUUCAA-3'

Htt siRNA (C01): 5'-CUGGUUGGUAUUCUUCUAGAA-3'

Htt siRNA (Hdh5): 5'-ACCGUCUCAAUCAUUGUCUAA-3'

qPCR primer sequences (5'~3', all primers have been validated by standard curves for efficiency (95%~105%) and linearity ( $R^2 > 0.999$ ):

|                                     |                          |
|-------------------------------------|--------------------------|
| Hprt-F                              | GTC AACGGGGGACATAAAAG    |
| Hprt-R                              | CAACAATCAAGACATTCTTTCCA  |
| Htt-F                               | CTGCACGGCATCCTCTATGT     |
| Htt-R                               | TGTTACGCAGTGGGCTATT      |
| Htt(#38)-F (for Htt mRNA stability) | CCTTCCCGTGAGTGAGTGA      |
| Htt(#38)-R (for Htt mRNA stability) | GCTGATAAAACCTGTCCCATGA   |
| Map2k6-F                            | CGGCCACATATCCAGAG        |
| Map2k6-R                            | ATGGCTTTTTAGTCCCCAAGT    |
| Mapk11-F                            | CCTGAGGTTCTGGCAAAGAT     |
| Mapk11-R                            | CACTGCTGAGGTCCTTCTGG     |
| HPRT-F                              | CCTGGCGTCGTGATTAGTG      |
| HPRT-R                              | TGATTAATAAACACCCTTTCCA   |
| HTT-F                               | CCTTTTTGAAGCAGCCCGTG     |
| HTT-R                               | TGCAGCATCCCCAAACAGAT     |
| DAXX_F                              | GAAGACGATGAGGAGAGTGATGAG |
| DAXX_R                              | GGCTCTGTCTCCATCTTTACCTG  |
